# Supplementary material for: Ferulic acid identification in brown rice using untargeted metabolomics and network analysis and its effects in mitigating AFB1-induced hepatic damage
Source: Royal Society of Chemistry journal article supplement (doi:10.1039/d5fo00178a), 2025-01-01
Supplement: d5fo00178a2.pdf [file d5fo00178a2.pdf]

## Supplementary Materials

### **Ferulic acid identification in brown rice using untargeted metabolomics and network analysis and its effects in mitigating AFB1-induced hepatic damage**

Qianqian Wang <sup>a</sup>, Gaigai Wang <sup>a</sup>, Yanan Wang <sup>a</sup>, Xin Fang <sup>a</sup>, Yutong Fu <sup>b</sup>, Guiming Li<sup>c</sup>, Shimeng Huang <sup>a</sup>, Qiugang Ma <sup>a</sup>, Lihong Zhao <sup>a\*</sup>

<sup>a</sup> State Key Laboratory of Animal Nutrition and Feeding, Poultry Nutrition and Feed Technology Innovation Team, College of Animal Science and Technology, China Agricultural University, Beijing 100193, P. R. China.

<sup>b</sup> School of Life and Environmental Sciences, Faculty of Science, The University of Sydney, Sydney, New South Wales 2006

<sup>c</sup> Poultry Institute, Shandong Academy of Agricultural Sciences, Jinan 250100, China

## **Supplementary Materials and Methods**

### **Polyphenol metabolome between white rice and brown rice**

#### **UPLC-ESI-MS/MS conditions**

The sample extracts were analyzed using an UPLC-ESI-MS/MS system (UPLC, ExionLC™ AD; MS, Applied Biosystems 4500 Q TRAP, <https://sciex.com.cn/>). The analytical conditions were as follows, UPLC: column, Agilent SB-C18 (1.8 μm, 2.1 mm \* 100 mm); The mobile phase was consisted of solvent A, pure water with 0.1% formic acid, and solvent B, acetonitrile with 0.1% formic acid. Sample measurements were performed with a gradient program that employed the starting conditions of 95% A, 5% B. Within 9 min, a linear gradient to 5% A, 95% B was programmed, and a composition of 5% A, 95% B was kept for 1 min. Subsequently, a composition of 95% A, 5.0% B was adjusted within 1.1 min and kept for 2.9 min. The flow velocity was set as 0.35 mL per minute; The column oven was set to 40°C; The injection volume was 2 μL. The effluent was alternatively connected to an ESI-triple quadrupole-linear ion trap (QTRAP)-MS. The ESI source operation parameters were as follows: source temperature 550°C; ion spray voltage (IS) 5500 V (positive ion mode)/-4500 V (negative ion mode); ion source gas I (GSI), gas II(GSII) and curtain gas (CUR) were set at 50, 60, and 25 psi, respectively; the collision-activated dissociation (CAD) was high. QQQ scans were acquired as MRM experiments with collision gas (nitrogen) set to medium.

#### **Cell viability assay**

The cell viability was determined with a CCK-8 assay. Briefly, cells ( $1 \times 10^4$  cells per well) were seeded in 96-well plates for 24 h, then cells were treated with different concentrations of reagents for 24 h. The CCK-8 assay was performed according to

previous study <sup>1</sup>.

### **ROS determination**

The production of ROS in AML12 cells was measured with a reactive oxygen species assay kit (Beyotime, Shanghai, China) according to the manufacturer's instructions. Briefly, the treated cells were incubated with DCF-DA (10 mM) for 30 min at 37 °C. Then cells were observed with the fluorescence microscope.

### **Mitochondrial membrane potential determination**

AML12 cells were incubated with JC-1 solution (Beyotime, Shanghai, China) for 20 min at 37 °C in the dark environment and were aspirated with the staining solution. Then the fluorescence intensity of cells was tested by an inverted fluorescence microscope.

### **Cell apoptosis detection**

Terminal-deoxynucleotidyl Transferase/(TdT-) Mediated Nick End Labeling (TUNEL) assay was used to detect apoptotic cells in the liver of mice. Liver Section (5 μm) were dewaxed with xylene, hydrated with graded ethanol solutions, and then treated with proteinase K. After treatment with equilibration buffer, liver sections were marked by FITC-12-dUTP, recombined with TdT enzyme, and stained by DAPI. The stained liver sections were observed under a fluorescence microscope. Cells with green fluorescence are apoptotic cells, while cells with blue fluorescence are living cells.

### **RNA extraction and quantitative real-time PCR analysis**

Total RNA in AML12 cells and liver of mice were isolated by FastPure® Cell/Tissue

Total RNA Isolation Kit V2 (RC112; Vazyme Biotech Co., Ltd., Nanjing, China) according to the manufacturer's instructions. The concentration of the RNA was measured in a NanoDrop-2000 spectrophotometer (ThermoFisher Scientific Co., Waltham MA, USA). Reverse transcription was done using the HiScript® II Q RT SuperMix for qPCR (R223-01; Vazyme Biotech Co., Ltd., Nanjing, China) following the manufacturer's instructions. Two-step quantitative real-time PCR was performed with SYBR qPCR Master Mix (Q712-02; Vazyme Biotech Co., Ltd., Nanjing, China) on a Real-Time PCR Detection Systems (Bio-Rad, Hercules, California, USA, CFX Connect™) according to the manufacturer's instructions. GenBank from the National Center for Biotechnology Information was used to design pairs of primers. PCR conditions were 95°C for 5 min, followed by 40 cycles of 95°C for 10s, 58°C for 30s, with a final extension at 72°C for 5 min. The mRNA expression levels of genes were determined based on the expression of the GAPDH using the  $2^{-\Delta\Delta C_t}$  method <sup>2</sup>.

**Table S1.** The quantitative real-time PCR primers used in this study.

| Target genes     | Primer sequence (5' to 3')                                   |
|------------------|--------------------------------------------------------------|
| <i>GAPDH</i>     | F: AGGTCGGTGTGAACGGATTTG<br>R: TGTAGACCATGTAGTTGAGGTCA       |
| <i>Caspase-3</i> | F: AGAGACATTCATGGGCCTGAAATAC<br>R: CACCATGGCTTAGAATCACACACAC |
| <i>Bax</i>       | F: GATCAGCTCGGGCACTTTAG<br>R: TTGCTGATGGCAACTTCAAC           |
| <i>Bcl-2</i>     | F: GCCACCTGTGGTCCATCT<br>R: CATCCCAGCCTCCGTTAT               |

F: forward; R, reverse. *GAPDH*, *Glyceraldehyde-3-phosphate dehydrogenase*; *Caspase-3*, *cysteine aspartate-specific protease 3*; *Bax*, *B-cell lymphoma-2-associated X protein*; *Bcl-2*, *B-cell lymphoma-2*.

**Table S2.** The differential metabolites identified between brown rice and white rice.

| No | Compounds                                            | Q1<br>(Da)   | Q3<br>(Da)   | Molecular<br>weight | Formula        | Ionization<br>model | Class I                  |
|----|------------------------------------------------------|--------------|--------------|---------------------|----------------|---------------------|--------------------------|
| 1  | Cyanidin 3-O-<br>(6-O-p-coumaroyl)<br>glucoside      | 595.<br>14   | 287.<br>06   | 595.14              | C30H27<br>O13+ | [M] <sup>+</sup>    | Flavonoids               |
| 2  | 1-O-Caffeoyl<br>Galactonic Acid                      | 357.<br>08   | 195.<br>05   | 358.09              | C15H18<br>O10  | [M-H] <sup>-</sup>  | Phenolic<br>acids        |
| 3  | 3,4'-Dihydroxy-3',5'-<br>dimethoxypropiophe<br>none  | 227.<br>0917 | 181.<br>0493 | 226.08358           | C11H14<br>O5   | [M+H] <sup>+</sup>  | Phenolic<br>acids        |
| 4  | 3'-Hydroxy-4'-O-<br>methylglabridin                  | 353.<br>14   | 295.<br>06   | 354.1467            | C21H22<br>O5   | [M-H] <sup>-</sup>  | Flavonoids               |
| 5  | Genistein-7-O-<br>galactoside-rhamnose*              | 579.<br>17   | 271.<br>06   | 578.1636            | C27H30<br>O14  | [M+H] <sup>+</sup>  | Flavonoids               |
| 6  | Vitexin-7-O-<br>(6"-feruloyl)glucoside               | 771.<br>21   | 177.<br>1    | 770.2058            | C37H38<br>O18  | [M+H] <sup>+</sup>  | Flavonoids               |
| 7  | Tamarixetin-3-O-<br>glucoside-7-O-<br>rhamnoside*    | 625.<br>1763 | 317.<br>0698 | 624.169             | C28H32<br>O16  | [M+H] <sup>+</sup>  | Flavonoids               |
| 8  | Nepetin-4'-O-<br>diglucoside                         | 641.<br>17   | 317.<br>06   | 640.1639            | C28H32<br>O17  | [M+H] <sup>+</sup>  | Flavonoids               |
| 9  | Aureusidin-4-O-<br>glucoside                         | 449.<br>11   | 287.<br>06   | 448.1006            | C21H20<br>O11  | [M+H] <sup>+</sup>  | Flavonoids               |
| 10 | O-Feruloyl 7-<br>hydroxycoumarin*                    | 339.<br>09   | 177.<br>05   | 338.079             | C19H14<br>O6   | [M+H] <sup>+</sup>  | Lignans and<br>Coumarins |
| 11 | Chrysoeriol feruloyl<br>glucosyl glucoside           | 801.<br>23   | 301.<br>07   | 800.2164            | C38H40<br>O19  | [M+H] <sup>+</sup>  | Flavonoids               |
| 12 | sophorabioside*                                      | 579.<br>17   | 271.<br>06   | 578.1636            | C27H30<br>O14  | [M+H] <sup>+</sup>  | Flavonoids               |
| 13 | Kaempferol-4'-O-<br>glucoside*                       | 449.<br>11   | 287.<br>06   | 448.1006            | C21H20<br>O11  | [M+H] <sup>+</sup>  | Flavonoids               |
| 14 | 3-Hydroxy-1-<br>(4-Hydroxy-3-<br>Methoxyphenyl)Propa | 197.<br>08   | 151.<br>04   | 196.0736            | C10H12<br>O4   | [M+H] <sup>+</sup>  | Phenolic<br>acids        |

|    |                                                                     |          |          |          |                                                              |                    |                |
|----|---------------------------------------------------------------------|----------|----------|----------|--------------------------------------------------------------|--------------------|----------------|
|    | n-1-One                                                             |          |          |          |                                                              |                    |                |
| 15 | Kaempferol-3-O-glucoside (Astragalin)*                              | 449.1078 | 287.0553 | 448.1006 | C <sub>21</sub> H <sub>20</sub> O <sub>11</sub>              | [M+H] <sup>+</sup> | Flavonoids     |
| 16 | Luteolin-7-O-neohesperidoside (Lonicerin)*                          | 595.1658 | 287.0584 | 594.1585 | C <sub>27</sub> H <sub>30</sub> O <sub>15</sub>              | [M+H] <sup>+</sup> | Flavonoids     |
| 17 | Hesperetin-7-O-glucoside                                            | 465.14   | 303.09   | 464.1319 | C <sub>22</sub> H <sub>24</sub> O <sub>11</sub>              | [M+H] <sup>+</sup> | Flavonoids     |
| 18 | Hispidulin-8-C-glucoside*                                           | 463.13   | 343.09   | 462.1162 | C <sub>22</sub> H <sub>22</sub> O <sub>11</sub>              | [M+H] <sup>+</sup> | Flavonoids     |
| 19 | Methylhesperidin                                                    | 625.21   | 317.1    | 624.2054 | C <sub>29</sub> H <sub>36</sub> O <sub>15</sub>              | [M+H] <sup>+</sup> | Flavonoids     |
| 20 | Petunidin-3-O-(6"-O-p-Coumaroyl) glucoside                          | 625.16   | 317.07   | 625.1552 | C <sub>31</sub> H <sub>29</sub> O <sub>14</sub> <sup>+</sup> | [M] <sup>+</sup>   | Flavonoids     |
| 21 | Arillanin A                                                         | 723.21   | 547.17   | 724.2215 | C <sub>33</sub> H <sub>40</sub> O <sub>18</sub>              | [M-H] <sup>-</sup> | Phenolic acids |
| 22 | 6-O-Feruloyl- β -D-glucose                                          | 355.1    | 193.05   | 356.1107 | C <sub>16</sub> H <sub>20</sub> O <sub>9</sub>               | [M-H] <sup>-</sup> | Phenolic acids |
| 23 | 3-Hydroxy-4-methoxybenzoic acid; Isovanillic Acid                   | 169.05   | 65.04    | 168.0423 | C <sub>8</sub> H <sub>8</sub> O <sub>4</sub>                 | [M+H] <sup>+</sup> | Phenolic acids |
| 24 | Kaempferol-3-O-Rutinoside (Nicotiflorin)*                           | 595.1658 | 287.0532 | 594.1585 | C <sub>27</sub> H <sub>30</sub> O <sub>15</sub>              | [M+H] <sup>+</sup> | Flavonoids     |
| 25 | Rhamnetin-3-O-Rutinoside*                                           | 625.1661 | 317.066  | 624.169  | C <sub>28</sub> H <sub>32</sub> O <sub>16</sub>              | [M+H] <sup>+</sup> | Flavonoids     |
| 26 | 5,7,4'-Trihydroxy-6,8-dimethoxyisoflavone-7-O-galactoside-rhamnose* | 655.19   | 331.08   | 654.1796 | C <sub>29</sub> H <sub>34</sub> O <sub>17</sub>              | [M+H] <sup>+</sup> | Flavonoids     |
| 27 | Syringic acid                                                       | 197.05   | 123.01   | 198.0528 | C <sub>9</sub> H <sub>10</sub> O <sub>5</sub>                | [M-H] <sup>-</sup> | Phenolic acids |
| 28 | Swertiajaponin                                                      | 463.12   | 313.07   | 462.1162 | C <sub>22</sub> H <sub>22</sub> O <sub>11</sub>              | [M+H] <sup>+</sup> | Flavonoids     |
| 29 | Isorhamnetin-3-O-neohesperidoside*                                  | 625.17   | 317.07   | 624.169  | C <sub>28</sub> H <sub>32</sub> O <sub>16</sub>              | [M+H] <sup>+</sup> | Flavonoids     |

---

|    |                                             |              |              |          |               |                    |                   |
|----|---------------------------------------------|--------------|--------------|----------|---------------|--------------------|-------------------|
| 30 | Isosaponarin<br>(Isovitexin-4'-O-glucoside) | 595.<br>17   | 313.<br>07   | 594.1585 | C27H30<br>O15 | [M+H] <sup>+</sup> | Flavonoids        |
| 31 | Luteolin-7-O-glucoside<br>(Cynaroside)*     | 449.<br>1078 | 287.<br>0622 | 448.1006 | C21H20<br>O11 | [M+H] <sup>+</sup> | Flavonoids        |
| 32 | Sibiricose A5*                              | 517.<br>16   | 175.<br>04   | 518.1636 | C22H30<br>O14 | [M-H] <sup>-</sup> | Phenolic<br>acids |
| 33 | 6-C-Methylquercetin-<br>3-O-rutinoside      | 625.<br>18   | 317.<br>06   | 624.169  | C28H32<br>O16 | [M+H] <sup>+</sup> | Flavonoids        |
| 34 | Chrysoeriol xylosyl<br>glucoside            | 595.<br>17   | 301.<br>07   | 594.1585 | C27H30<br>O15 | [M+H] <sup>+</sup> | Flavonoids        |
| 35 | Chrysoeriol-7-O-rutinoside-5-O-glucoside    | 771.<br>23   | 463.<br>2    | 770.2269 | C34H42<br>O20 | [M+H] <sup>+</sup> | Flavonoids        |

---



## Supplementary References

1. Q. Wang, T. Liu, M. Koci, Y. Wang, Y. Fu, M. Ma, Q. Ma and L. Zhao, Chlorogenic Acid Alleviated AFB1-Induced Hepatotoxicity by Regulating Mitochondrial Function, Activating Nrf2/HO-1, and Inhibiting Noncanonical NF-kappaB Signaling Pathway, *Antioxidants (Basel)*, 2023, **12**.
2. K. J. Livak and T. D. Schmittgen, Analysis of relative gene expression data using real-time quantitative PCR and the 2(-Delta Delta C(T)) Method, *Methods*, 2001, **25**, 402-408.
